# Supplementary material
Source: PubMed Central journal article supplement (PMC4600597)
Supplement: NIHMS725471-supplement-Supplemental_Information.pdf [file NIHMS725471-supplement-Supplemental_Information.pdf]

Supplemental information for

## ***$\alpha$ -Methyl Acyl CoA Racemase Provides Mycobacterium tuberculosis Catabolic Access to Cholesterol Esters***

Rui Lu,<sup>1</sup> Werner Schmitz,<sup>2</sup> Nicole S. Sampson<sup>1,\*</sup>

<sup>1</sup>Department of Chemistry, Stony Brook University, Stony Brook, New York 11794-3400, United States

<sup>2</sup>Lehrstuhl für Biochemie und Molekularbiologie, Biozentrum - Am Hubland, 7074 Würzburg, Germany

### **Materials and Methods**

**Materials, strains, media, and general methods.** Ferricinium hexafluorophosphate and ATP were purchased from Sigma-Aldrich (St. Louis, MO). Coenzyme A was purchased from MP Biomedicals (Solon, Ohio). HEPES and TAPS were purchased from Fisher Scientific (Pittsburgh, PA). MALDI mass spectra were acquired on a Bruker Autoflex II TOF/TOF. UV-visible spectra were acquired on a Shimadzu UV2550 UV/visible light spectrophotometer. (2*S*R, 2*S*S)-3-OCS-CoA was synthesized as previously described.<sup>1</sup> MCR<sup>2</sup> and ChsE4-ChsE5<sup>1</sup> were obtained as purified proteins as previously described.

**MCR activity assay.** (2*S*R, 2*S*S)-3-OCS-CoA was used as a 1:1 2*S*R:2*S*S mixture. The MCR activity was monitored in a continuous coupled assay in which the dehydrogenation reaction catalyzed by ChsE4-ChsE5 was followed at 300 nm. 3-OCS-CoA (2.5 - 60  $\mu$ M), 250  $\mu$ M ferricinium hexafluorophosphate and 1  $\mu$ M ChsE4-ChsE5 were incubated in 100 mM TAPS buffer (pH 8.5) at 25 °C. 22 nM MCR was added when the 300 nm absorption was stable. Initial velocities were obtained for the first 10-15% of the reaction. The rates of product formation were fit to the Michaelis-Menten equation to determine  $K_M$  and  $k_{cat}$ . Controls were run without MCR or without substrate, and both showed negligible decreases in absorbance at 300 nm.

**Synthesis of (2*S*S)  $\Delta^7$ -dafachronyl CoA and ChsE4-ChsE5 stereochemistry assignment.** (2*S*S)- $\Delta^7$ -dafachronic acid (12.5  $\mu$ g, AdipoGen AG-CN2-0014 Lot No. A00075, contaminated with ~30% (2*S*R)- $\Delta^7$ -dafachronic acid) was dissolved in 30  $\mu$ L 25% (w/v) 2-hydroxypropyl- $\beta$ -cyclodextrin aqueous solution to obtain a stock solution of 1 mM acid. Thioesterification of (2*S*S)  $\Delta^7$ -dafachronic acid (0.25 mM) was performed in 100 mM HEPES buffer (100  $\mu$ L, pH = 8.0) with 1.5 mM ATP, 1 mM CoA, 10 mM MgCl<sub>2</sub>, and 2  $\mu$ M FadD19 at 30 °C for 1 h. Formation of the reaction product (2*S*S)- $\Delta^7$ -dafachronyl-CoA was confirmed by MALDI-TOF spectroscopy. After confirming the product was formed, 20  $\mu$ L of the reaction mixture was mixed with 20  $\mu$ L DDI water, 5  $\mu$ L 1M HEPES pH = 8.0, 3  $\mu$ L 10 mM ferrocenium hexafluorophosphate and 2  $\mu$ L 52  $\mu$ M ChsE4-ChsE5. The reaction mixture was analyzed by MALDI-TOF after 1, 2 and 24 h. After 24 h, 20  $\mu$ L of the dehydrogenation reaction mixture was mixed with 1  $\mu$ L 3.6  $\mu$ M MCR to test the racemase activity. The MCR reaction mixture was also analyzed by MALDI-TOF spectroscopy. Substrate and product ratios were calculated based on the integrations of respective m/z peaks.

1. Yang, M., Lu, R., Guja, K. E., Wiperman, M. F., St Clair, J. R., Bonds, A. C., Garcia-Diaz, M., and Sampson, N. S. (2015) Unraveling Cholesterol Catabolism in : ChsE4-ChsE5  $\alpha_2\beta_2$  Acyl-CoA Dehydrogenase Initiates beta-Oxidation of 3-Oxo-cholest-4-en-26-oyl CoA. *ACS Infect. Dis.* 1, 110-125.
2. Bhaumik, P., Kursula, P., Ratas, V., Conzelmann, E., Hiltunen, J. K., Schmitz, W., and Wierenga, R. K. (2003) Crystallization and preliminary X-ray diffraction studies of an  $\alpha$ -methylacyl-CoA racemase from *Mycobacterium tuberculosis*. *Acta. Cryst. D* 59, 353-355.
